# Supplementary material for: Genetic Association of Plasma Homocysteine Levels with Gastric Cancer Risk: A Two-Sample Mendelian Randomization Study
Source: Oxford University Press journal article supplement (doi:10.1158/1055-9965.epi-19-0724), 2019-11-20
Supplement: 10559965epi190724-sup-224481_2_supp_5832772_pzdknl.docx [file 10559965epi190724-sup-224481_2_supp_5832772_pzdknl.docx]

| Table S1. Characteristics of the cases and controls. | | | | | | | | | | | |
| --- | --- | --- | --- | --- | --- | --- | --- | --- | --- | --- | --- |
|  | Nanjing | |  | Beijing | |  | NCI - Shanxi | |  | NCI - Linxian | |
| Variables | Cases | Controls |  | Cases | Controls |  | Cases | Controls |  | Cases | Controls |
| N=550 | N=1155 |  | N=456 | N=1118 |  | N=1368 | N=1650 |  | N=257 | N=450 |
| Age, N (%) |  |  |  |  |  |  |  |  |  |  |  |
| <60 | 292 (53.09) | 583 (50.48) |  | 256 (56.14) | 437 (39.09) |  | 660 (48.25) | 851 (51.58) |  | 71 (27.63) | 149 (33.11) |
| ≥60 | 258 (46.91) | 572 (49.52) |  | 200 (43.86) | 681 (60.91) |  | 708 (51.75) | 799 (48.42) |  | 186 (72.37) | 301 (66.89) |
| Sex, N (%) |  |  |  |  |  |  |  |  |  |  |  |
| Male | 392 (71.27) | 823 (71.26) |  | 322 (70.61) | 873 (78.09) |  | 1108 (80.99) | 1220 (73.94) |  | 152 (59.14) | 210 (46.67) |
| Female | 158 (28.73) | 332 (28.74) |  | 134 (29.39) | 245 (21.91) |  | 260 (19.01) | 430 (26.06) |  | 105 (40.86) | 240 (53.33) |
| Cancer site, N (%) |  |  |  |  |  |  |  |  |  |  |  |
| Cardia | 0 (0.00) | - |  | 0 (0.00) | - |  | 853 (62.35) | - |  | 257 (100.00) | - |
| Noncardia | 550 (100.00) | - |  | 456 (100.00) | - |  | 515 (37.65) | - |  | 0 (0.00) | - |
